# Supplementary material for: Validity of a tool designed to assess the preventability of potentially preventable hospitalizations for chronic conditions
Source: PubMed Central journal article supplement — Fam Pract. 2019 Dec 18;37(3):390–4. doi: 10.1093/fampra/cmz086 (PMC7377343; doi:10.1093/fampra/cmz086), 2019-12-18
Supplement: cmz086_suppl_supplementary_material_2.pdf [file cmz086_suppl_supplementary_material_2.pdf]

## Panel Preventability Assessment Tool (P-PAT)

Considering all that you know about this patient from the case summary provided, please consider the following factors when considering whether the admission was preventable.

**PATIENT FACTORS** including:

- poor mobility or physical functional status,
- poor cognitive function,
- mental health problems,
- lack of social support,
- support from existing carer inadequate, support needed for the carer or carer illness/death etc.

**SELF-CARE** including:

- poor adherence to medication regimen,
- medication change causing problems,
- self-care guided by an alternative therapy or illness belief that takes priority over standard medical advice,
- poor adherence to other aspects of disease self-management (e.g. diet, fluid restriction),
- inadequate self-management skills, including of health risk factors

**PRIMARY CARE FACTORS** including:

- inadequate medical management of existing chronic condition,
- inadequate medical management of known conditions predisposing to admission (e.g. malnutrition, co-morbidities, poor mobility),
- no GP, or has a GP but insufficient or inadequate connection with GP,
- no Community Nursing/Allied Health services, or has Community Nursing/Allied Health services but inadequate/insufficient

**COORDINATION OF CARE** including:

- poor communication and/or coordination between care providers - e.g. hospital, GP, allied health staff, and NGOs

**ACCESS TO CARE (clinical and non-clinical care)** including:

- unable to see specialist when required,
- needed social/welfare community-based services not available when required,
- physical/ logistics barriers (e.g. remoteness, transport, carer availability), cost barriers (e.g. cost of pharmaceuticals, investigations, cost of food, cost of seeing GP, specialist)

**HOSPITAL ADMISSION CHARACTERISTICS** including:

- admission policy/practice specific to this hospital (e.g. policies/practices that support admissions for non-medical reasons),
- the admitting doctor not confident enough to send patient home when a more experienced doctor would have, the general tendency for the admitting doctor to admit patients readily,
- admission decision was influenced by the time of day or day of the week the patient presented to the hospital,
- complication from a previous hospital admission, poor discharge practices from most recent admission causing lack of appropriate follow up

Panel site: Blacktown

Study admission ID: \_\_\_\_\_

Panel member (please tick):

- Community/chronic disease nurse
- General Practitioner
- Physician

Definition of preventable admissions:

When an unplanned admission could have been prevented if:

1) appropriate, adequate, accessible and good quality 'support in the community' had been available and accessed in the preceding 3 months; and/or

2) appropriate individual health behaviours e.g. disease self-management, had occurred in the 3 months prior to admission.

'Support in the community' might include primary health care, family/neighbour/friend/social support, health or non-health community services.

1. Considering all that has happened to this patient in the last three months, please indicate whether you are **reasonably confident** that this admission was preventable (**given currently available services and social support**):

- Yes: Please describe what you think would have made a difference and/or could have been done differently to prevent the admission (**given currently available services and social support**):

---

---

- No

2. Considering all that has happened to this patient in the last three months, please indicate whether you are **reasonably confident** that this admission was **NOT** preventable (**given currently available services and social support**):

- Yes: Please describe why you think that nothing would have made a difference and/or could have been done differently to prevent the admission (**given currently available services and social support**):

---

---

- No

3. Can you suggest any **improved or additional services or social support** which, if available, could have helped prevent this patient's admission?

- Yes: Please describe any **improved or additional services or social support** which, if available, could have helped prevent this patient's admission:

---

---

- No
